# Supplementary material for: Zeolite encapsulated active metal composites and their photocatalytic studies for rhodamine-B, reactive red-198 and chloro-phenols
Source: Royal Society of Chemistry journal article supplement (doi:10.1039/c5ra13034d), 2015-01-01
Supplement: c5ra13034d1.pdf [file c5ra13034d1.pdf]

## Electronic supplementary data

### Zeolite encapsulated active metal composites and their photocatalytic studies for the rhodamine-b, reactive red-198 and chloro- phenols

G. Ramanjaneya Reddy<sup>a</sup>, S. Balasubramanian<sup>a</sup>, K. Chennakesavulu<sup>b,c\*</sup>

#### Table of contents

| Fig. no | Figure Caption                                                                                                                                     | Page no |
|---------|----------------------------------------------------------------------------------------------------------------------------------------------------|---------|
| S1      | Powder XRD patterns of PdY                                                                                                                         | 2       |
| S2      | XPS survey spectrum of NaY                                                                                                                         | 2       |
| S3      | The O1s deconvoluted spectra of (a) NaY (b) NbPdY and (c) TaPdY                                                                                    | 3       |
| S4      | TG/DTG curves of the (a) NaY, (b) NaPdY and (c) TaPdY                                                                                              | 4       |
| S5      | The SEM/EDAX micrographs of the (a) NaY, (b) PdY (c) NbPdY and (d) TaPdY                                                                           | 5       |
| S6      | Particle size distribution curves for the (a) NaY, (b) PdY, (c) NbPdY and (d) TaPdY                                                                | 5       |
| S7      | The absorption plots for the photo degradation of RhB in the presence of (a) NaY, (b) PdY, (c) NbPdY and (d) TaPdY under visible light irradiation | 6       |
| S8      | The absorption plots for the photo degradation of RR in the presence of (a) NaY, (b) PdY, (c) NbPdY and (d) TaPdY under visible light irradiation  | 7       |
| S9      | The absorption plots for the photo degradation of 2CP in the presence of (a) NaY, (b) PdY, (c) NbPdY and (d) TaPdY under visible light irradiation | 8       |
| S10     | The absorption plots for the photo degradation of 4CP in the presence of (a) NaY, (b) PdY, (c) NbPdY and (d) TaPdY under visible light irradiation | 8       |
| S11     | The powder XRD patterns of recovered (a) NbPdY and (b) TaPdY                                                                                       | 9       |
| S12     | The DRS spectrum of recovered (a) NbPdY and (b) TaPdY catalysts                                                                                    | 9       |
| S13     | SEM images of the recovered NbPdY and TaPdY                                                                                                        | 10      |
| -       | <b>Table A:</b> The Si/Al ratio of the composite                                                                                                   | 10      |

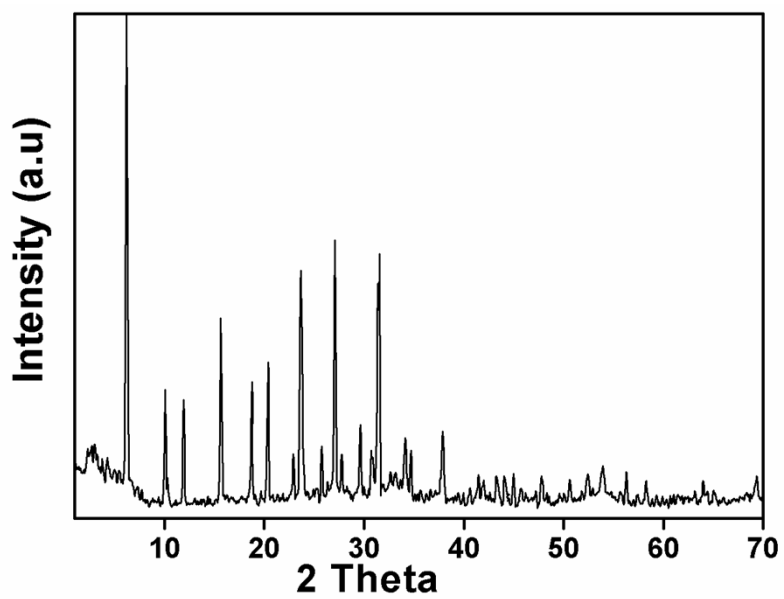

**Fig. S1:** Powder XRD patterns of PdY

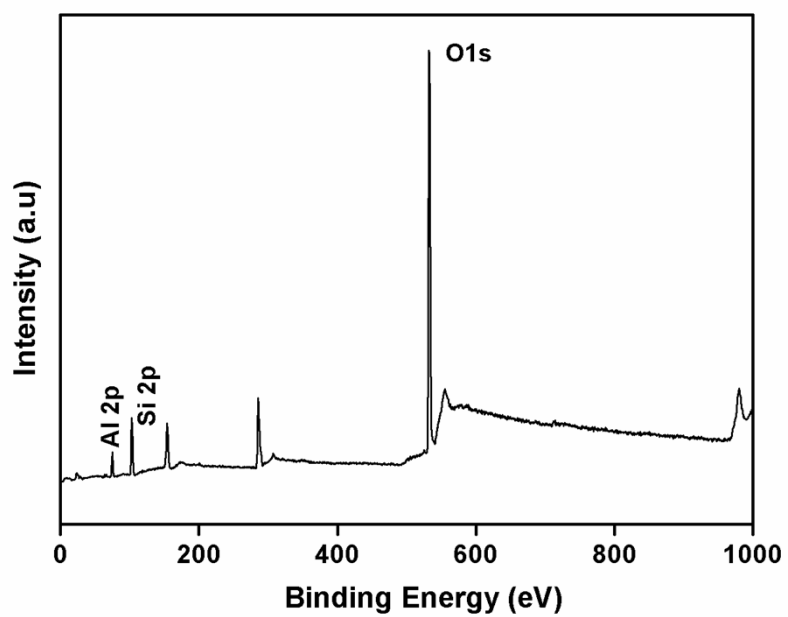

**Fig. S2:** XPS survey spectrum of NaY

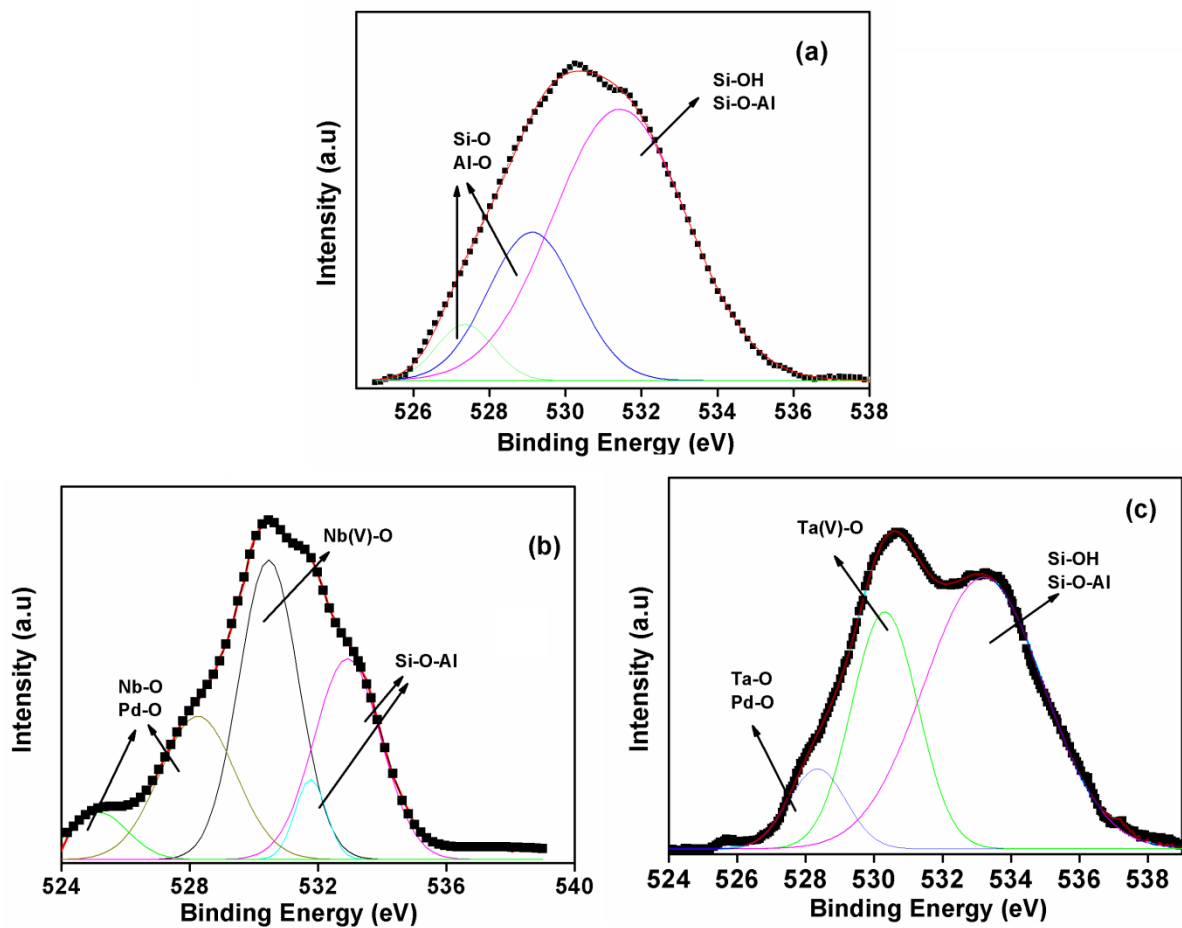

**Fig. S3:** The O1s deconvoluted spectra of (a) NaY (b) NbPdY and (c) TaPdY

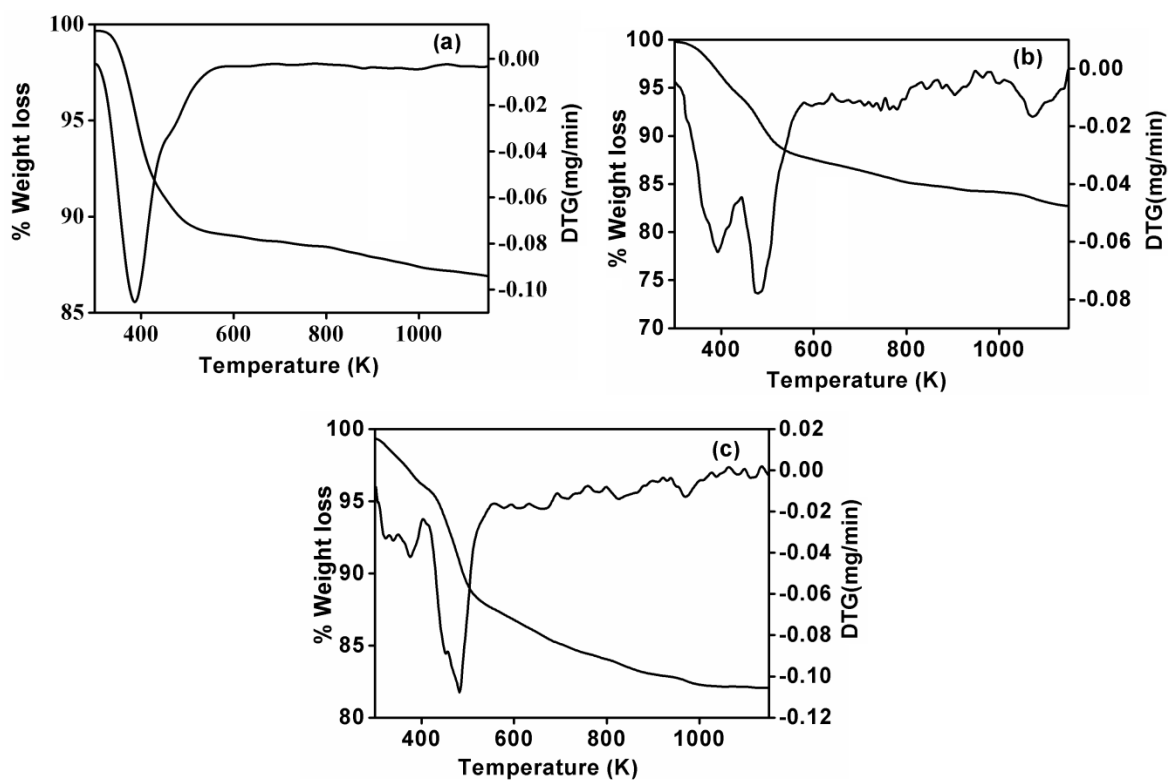

**Fig.S4:** TG-DTG curves of the (a) NaY, (b) NaPdY and (c) TaPdY

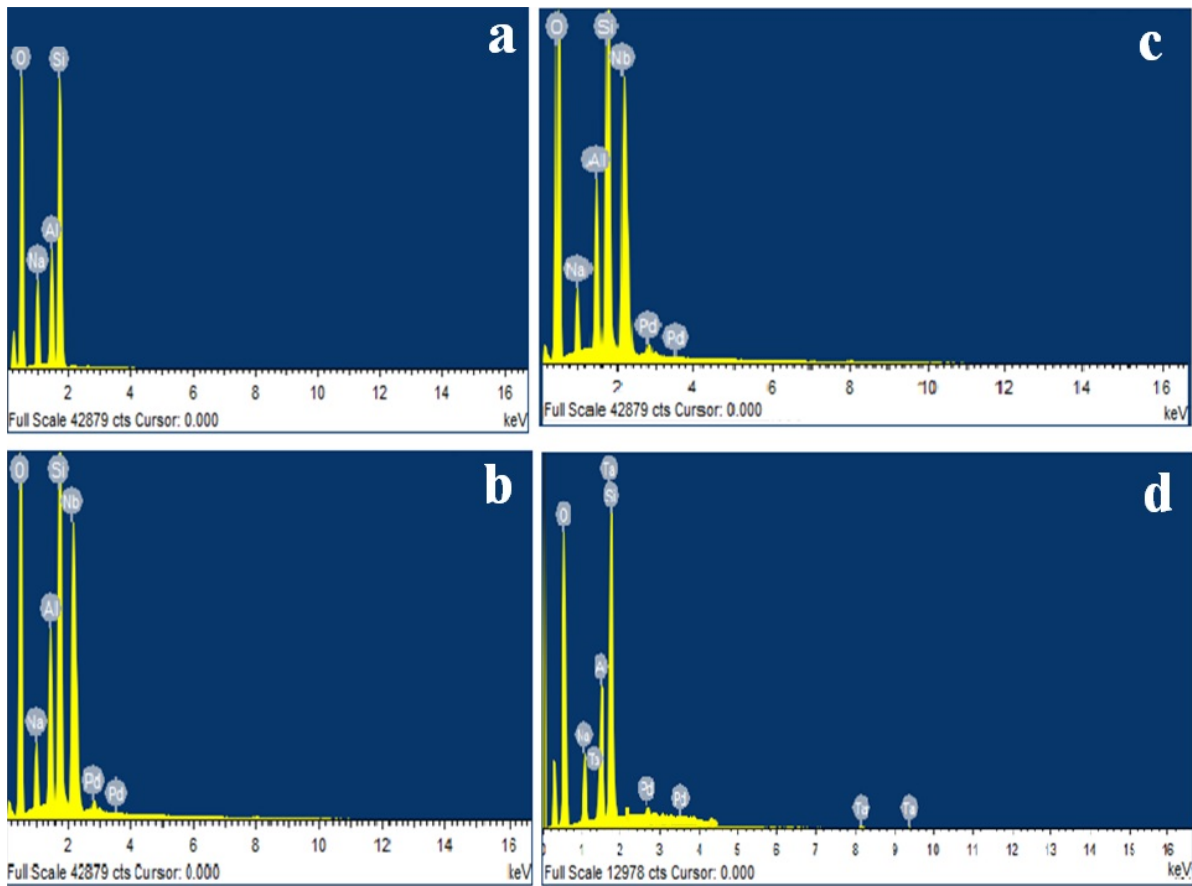

**Fig. S5:** The SEM/EDAX micrographs of the (a) NaY, (b) PdY (c) NbPdY and (d) TaPdY.

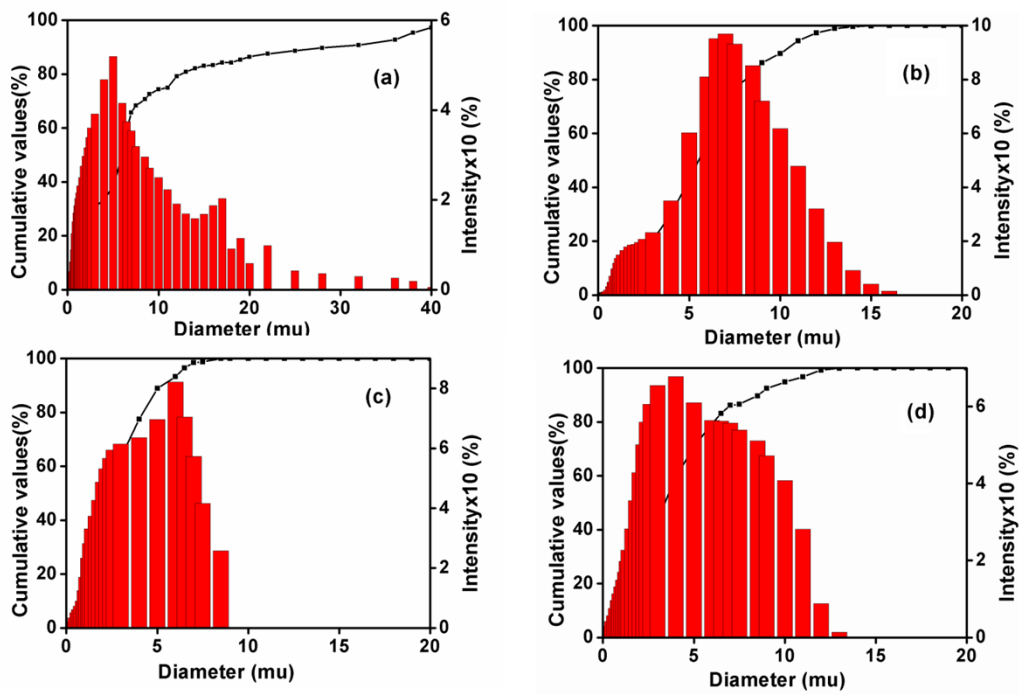

**Fig. S6:** Particle size distribution curves for the (a) NaY, (b) PdY, (c) NbPdY and (d) TaPdY

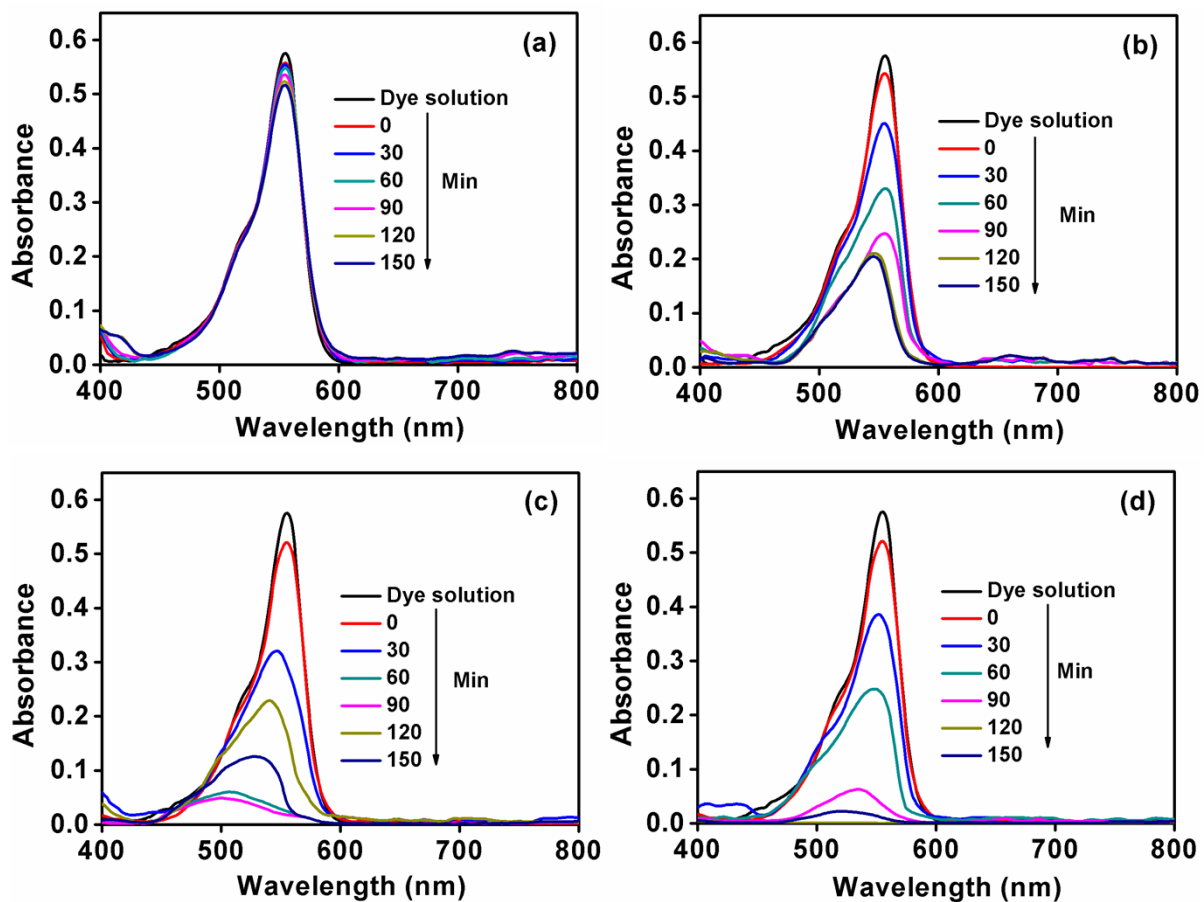

**Fig. S7:** The absorption plots for the photo degradation of RhB in the presence of (a) NaY, (b) PdY, (c) NbPdY and (d) TaPdY under visible light irradiation

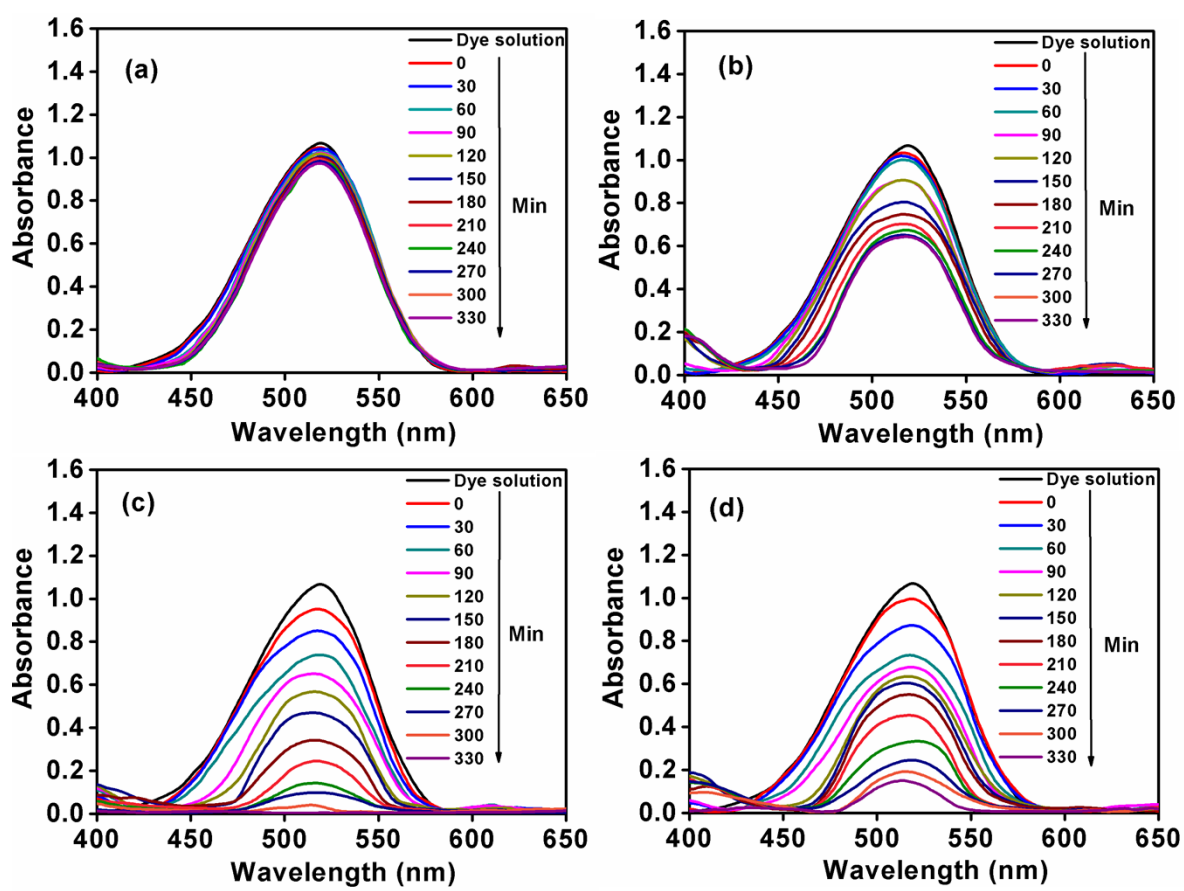

**Fig. S8:** The absorption plots for the photo degradation of RR in the presence of (a) NaY, (b) PdY, (c) NbPdY and (d) TaPdY under visible light irradiation

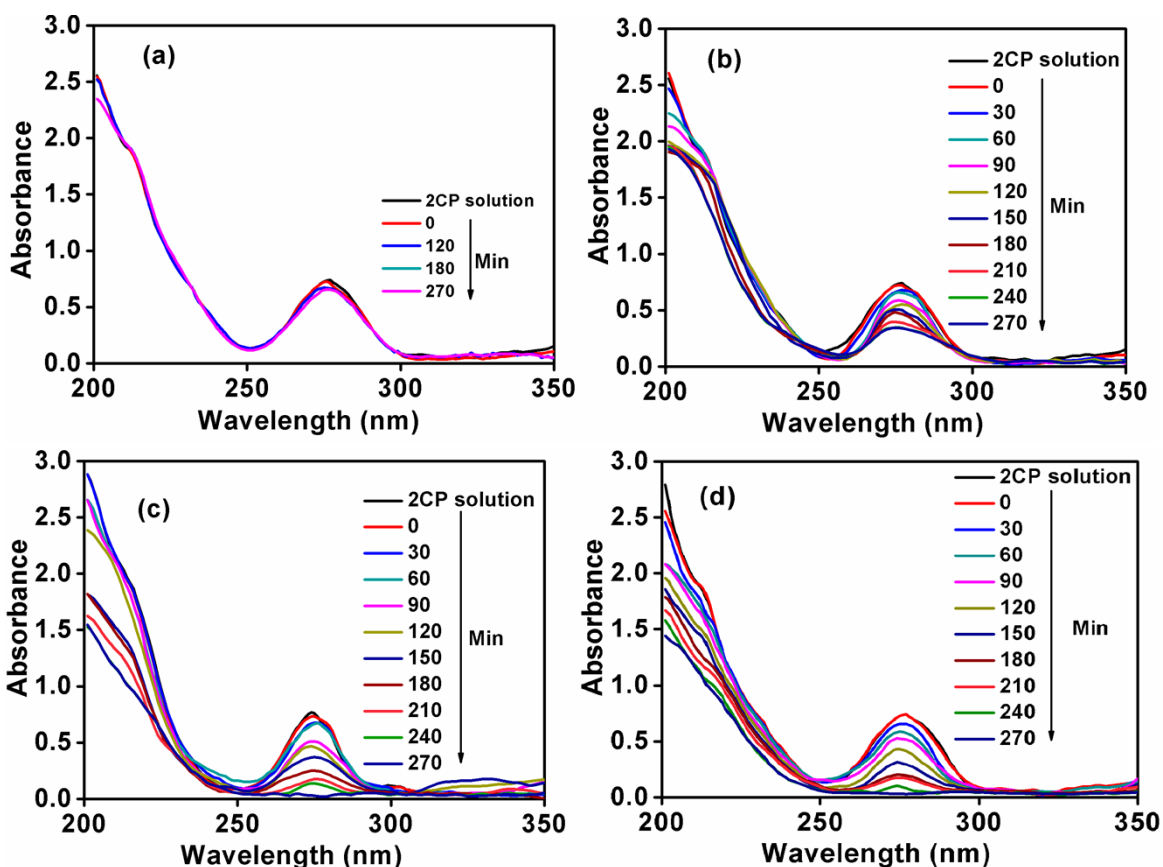

**Fig. S9:** The absorption plots for the photo degradation of 2CP in the presence of (a) NaY, (b) PdY, (c) NbPdY and (d) TaPdY under visible light irradiation.

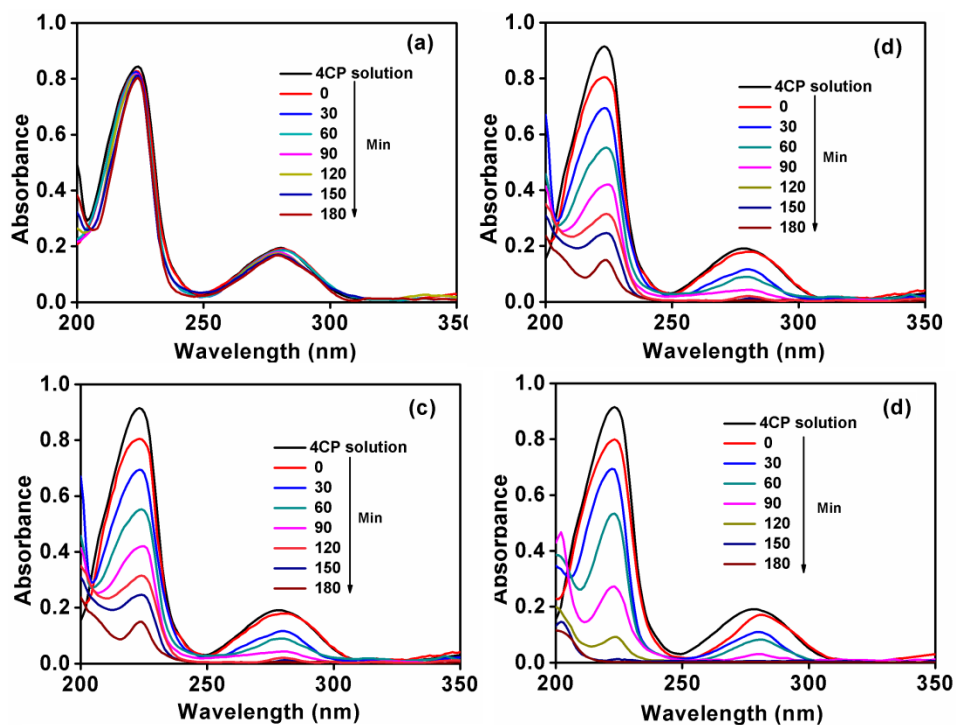

**Fig. S10:** The absorption plots for the photo degradation of 4CP in the presence of (a) NaY, (b) PdY, (c) NbPdY and (d) TaPdY under visible light irradiation



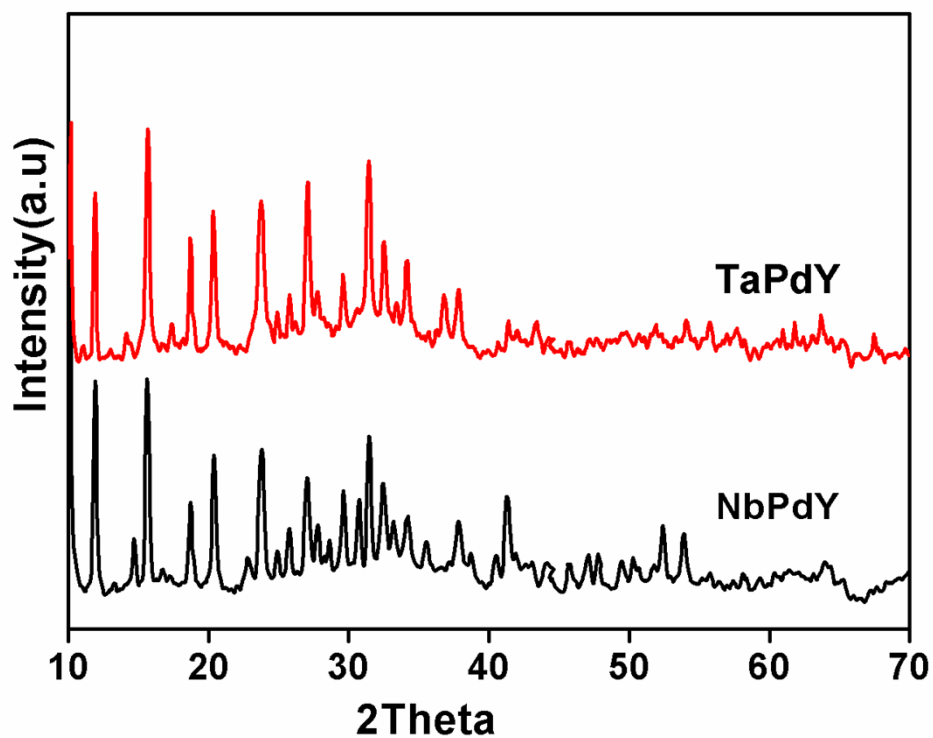

**Fig. S11:** The powder XRD patterns of recovered (a) NbPdY and (b) TaPdY.

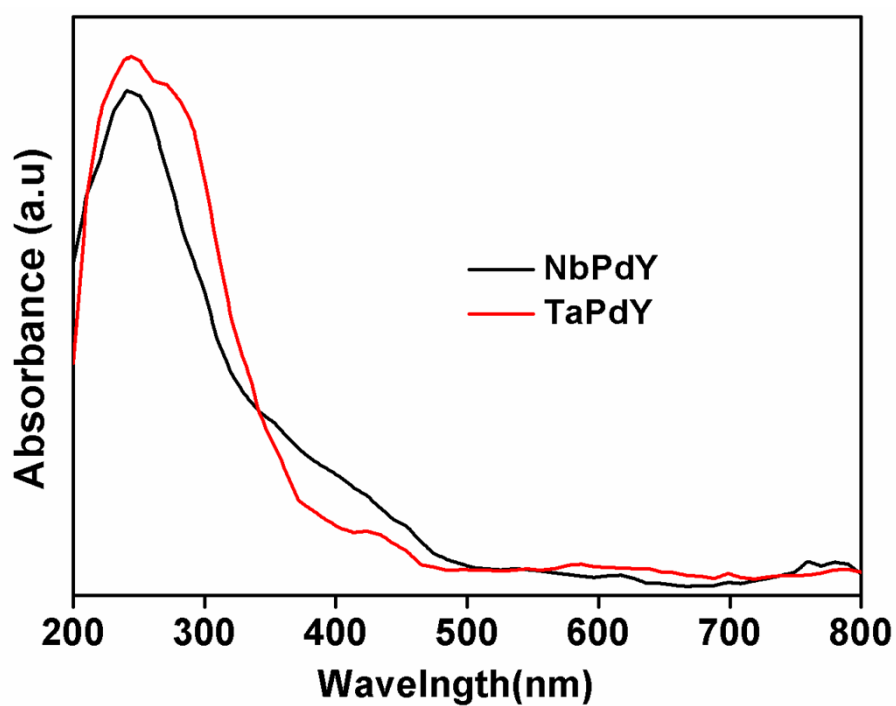

**Fig. S12:** DRS/UV-visible spectra of the recovered (a) NbPdY and (b) TaPdY catalysts.

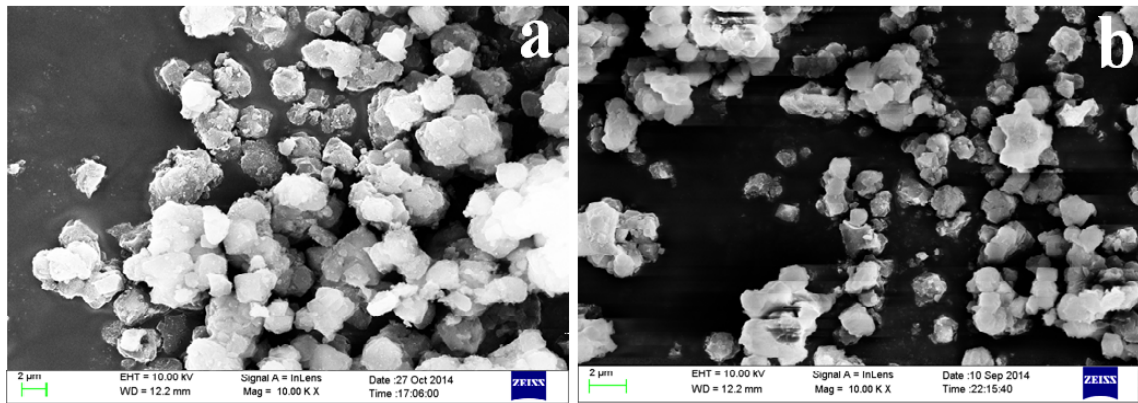

**Fig. S13:** SEM images of the reused NbPdY and TaPdY

**Table A:** The Si/Al ratio of the composites

| Sl.No | Materials | Si%  | Al% | Na% | Si/Al |
|-------|-----------|------|-----|-----|-------|
| 1     | NaY       | 22.7 | 8.1 | 7.8 | 2.6   |
| 2     | PdY       | 21.1 | 7.9 | 6.5 | 2.7   |
| 3     | NbPdY     | 21.5 | 8.0 | 4.5 | 2.6   |
| 4     | TaPdY     | 20.8 | 7.8 | 3.2 | 2.6   |
